# Supplementary material for: Differential T Cell Signaling Pathway Activation by Tacrolimus and Belatacept after Kidney Transplantation: Post Hoc Analysis of a Randomised-Controlled Trial
Source: PubMed Central journal article supplement (PMC5680251; doi:10.1038/s41598-017-15542-y), 2017-11-09
Supplement: 41598_2017_15542_MOESM1_ESM.pdf [file 41598_2017_15542_MOESM1_ESM.pdf]

# Supplementary Figures and Tables

## **Differential T Cell Signaling Pathway Activation by Tacrolimus and Belatacept after Kidney Transplantation: Post Hoc Analysis of a Randomised-Controlled Trial**

NYNKE M. KANNEGIETER\*; DENNIS A. HESSELINK; MARJOLEIN DIETERICH; GRETCHEN N. DE GRAAV; RENS KRAAIJEVELD; CARLA C. BAAN

\*corresponding author

Department of Internal Medicine, Erasmus MC, University Medical Center Rotterdam, Rotterdam, the Netherlands

### **Address for Correspondence:**

Nynke M. Kannegieter

Dept. of Internal Medicine, Division of Nephrology and Transplantation

Erasmus MC, University Medical Center Rotterdam

Room Na-522

Wytemaweg 80

3015 CN, Rotterdam

The Netherlands

E-mail: [n.kannegieter@erasmusmc.nl](mailto:n.kannegieter@erasmusmc.nl)

Phone: +31-(0)10-7033867

Supplementary Figure S1:

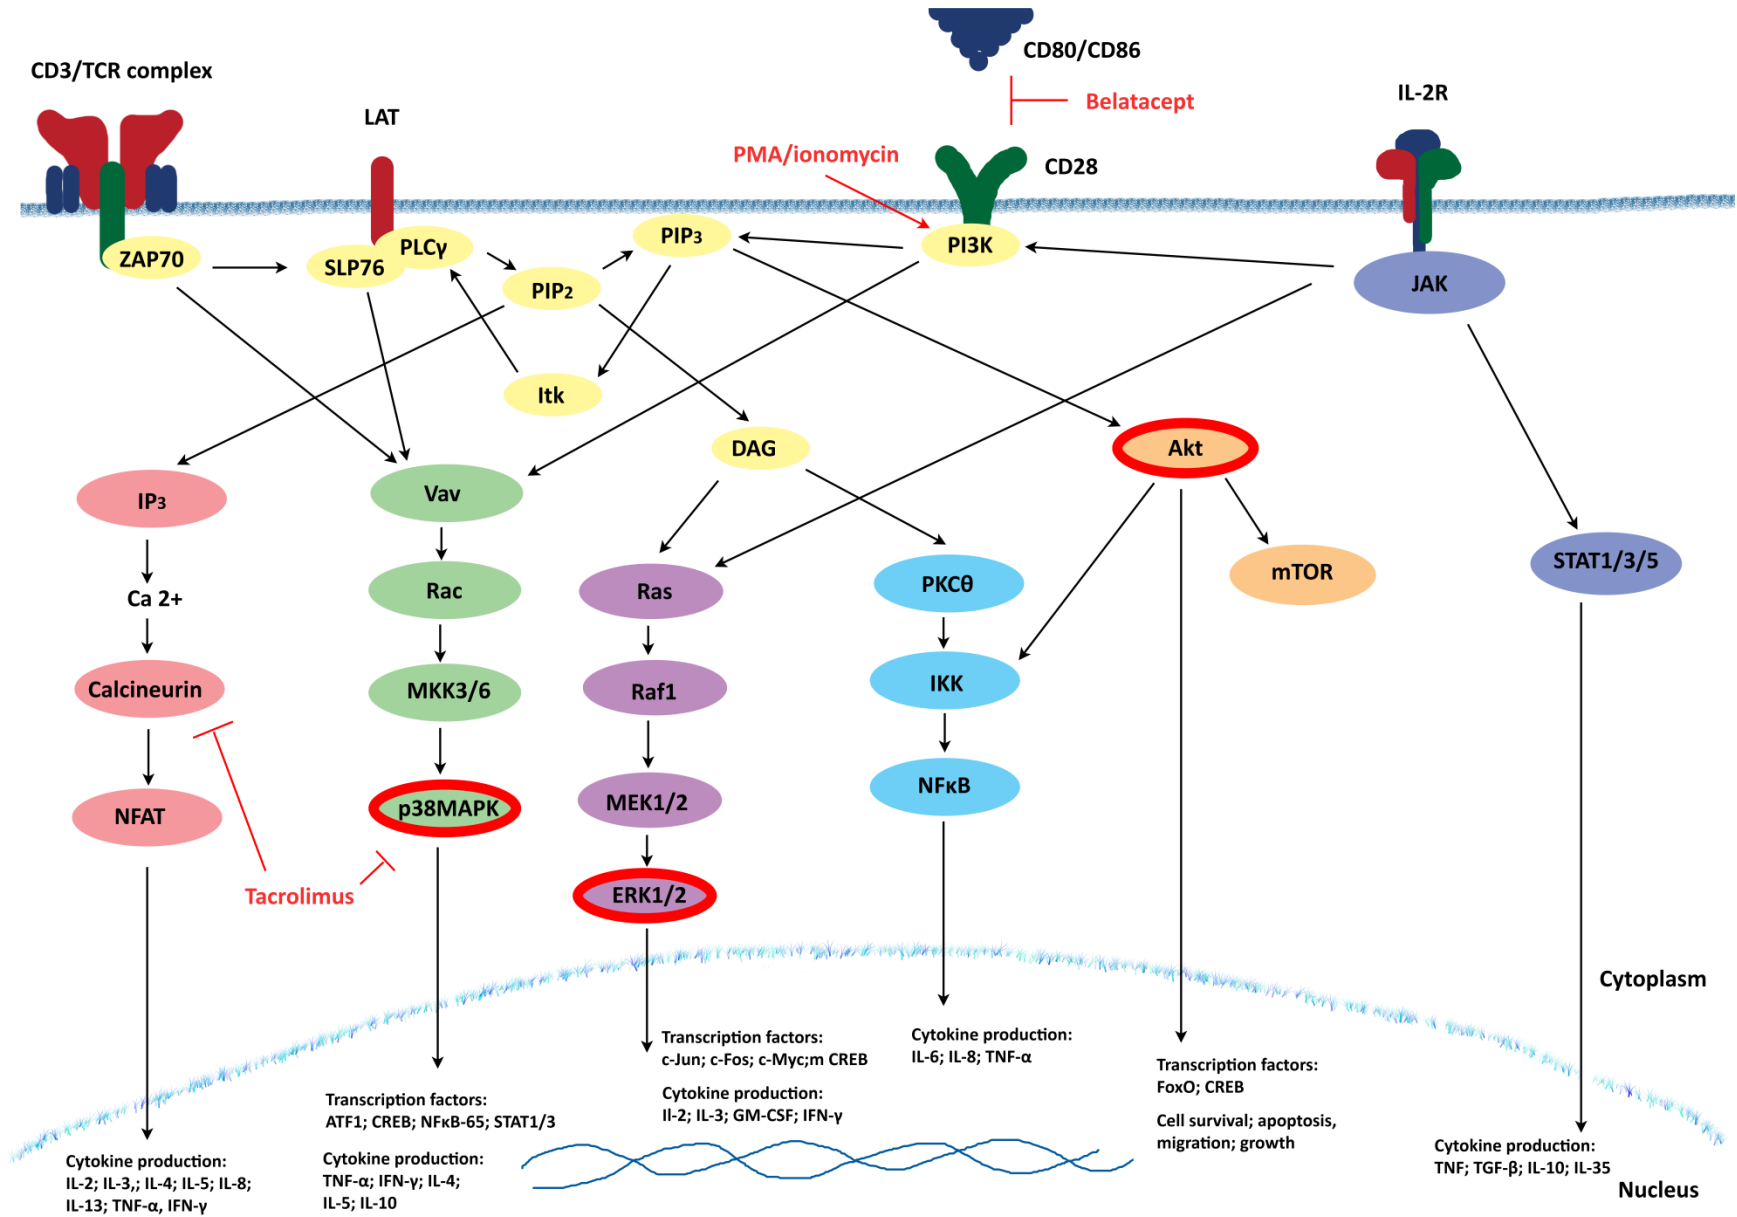

**Supplementary Figure S1.** Schematic overview of T cell signaling pathways and their interaction downstream of the TCR. After antigen recognition by the TCR and after receiving a co-stimulatory signal via CD28, several intracellular signaling pathways become activated via phosphorylation. These pathways include the signaling molecules p38MAPK, ERK1/2 and Akt. Downstream of the signaling pathways, this activation will initiate gene-transcription and the control of T cell functions, such as cytokine production, cell survival, cell differentiation and cell apoptosis. Activation of the signaling pathways can be mimicked by the stimulation of the T cell with PMA/ionomycin. TAC is known to inhibit the calcineurin and p38MAPK pathway, while BELA blocks the co-stimulatory signal between the CD80/86 molecule on APC's and the CD28 molecule on T cells.

**Supplementary Table S2:** Baseline characteristics at time of transplantation\*

|                                  | <b>Belatacept group<br/>(n = 20)</b> | <b>Tacrolimus group<br/>(n = 20)</b> | <b>p</b> |
|----------------------------------|--------------------------------------|--------------------------------------|----------|
| Age (years)                      | 57 (25-76)                           | 55 (21-76)                           | 0.88     |
| Male / female                    | 14 (70%) / 6 (30%)                   | 16 (80%) / 4 (20%)                   | 0.72     |
| Ethnicity                        |                                      |                                      | 1.00     |
| • Caucasian                      | 17 (85%)                             | 16 (80%)                             |          |
| • African                        | 2 (10%)                              | 2 (10%)                              |          |
| • Asian                          | 1 (5%)                               | 2 (10%)                              |          |
| Body weight (kg)                 | 79.0 (56.6-111.4)                    | 93.6 (51.4-120.0)                    | 0.06     |
| HLA A mismatch (mean ± SD)       | 1.1 (± 0.7)                          | 1.4 (± 0.5)                          | 0.13     |
| HLA B mismatch (mean ± SD)       | 1.3 (± 0.5)                          | 1.5 (± 0.5)                          | 0.51     |
| HLA DR mismatch (mean ± SD)      | 1.1 (± 0.4)                          | 1.3 (± 0.4)                          | 0.70     |
| Current PRA (%)                  | 0 (0-5)                              | 0 (0-17)                             | 0.30     |
| Peak PRA (%)                     | 4 (0-6)                              | 4 (0-21)                             | 0.78     |
| CMV status                       |                                      |                                      | 0.80     |
| • Donor + / Recipient -          | 3 (15%)                              | 2 (10%)                              |          |
| • Donor + / Recipient +          | 4 (20%)                              | 7 (35%)                              |          |
| • Donor - / Recipient -          | 7 (35%)                              | 6 (30%)                              |          |
| • Donor - / Recipient +          | 6 (30%)                              | 5 (25%)                              |          |
| Donor age (years)                | 59 (24-71)                           | 51 (22-80)                           | 0.18     |
| Related / unrelated donor        | 6 (30%) / 14 (70%)                   | 5 (25%) / 15 (75%)                   | 1.00     |
| Cause of end-stage renal disease |                                      |                                      | 0.09     |
| • Diabetes mellitus              | 3 (15%)                              | 7 (35%)                              |          |
| • Hypertension                   | 2 (10%)                              | 5 (25%)                              |          |
| • IgA nephropathy                | 1 (5%)                               | 3 (15%)                              |          |
| • Polycystic kidney disease      | 3 (15%)                              | 3 (15%)                              |          |
| • Obstructive nephropathy        | 3 (15%)                              | 1 (5%)                               |          |
| • Unknown                        | 5 (25%)                              | 0 (0%)                               |          |
| • Other                          | 3 (15%)                              | 1 (5%)                               |          |
| Renal replacement therapy        |                                      |                                      | 0.91     |
| • None (pre-emptive)             | 10 (50%)                             | 12 (60%)                             |          |
| • Hemodialysis                   | 7 (35%)                              | 6 (30%)                              |          |
| • Peritoneal dialysis            | 3 (15%)                              | 2 (10%)                              |          |
| Time on dialysis (days)          | 425 (123-2782)                       | 605 (465-1519)                       | 0.41     |
| Number of kidney transplantation |                                      |                                      | 1.00     |
| • First                          | 19 (95%)                             | 20 (100%)                            | 1.00     |
| • Second                         | 1 (5%)                               | -                                    |          |

Continuous variables are presented as medians (plus ranges) and categorical variables as numbers (plus percentages), unless otherwise specified

BPAR, biopsy-proven acute rejection; CMV, cytomegalovirus; HLA, human leukocyte antigen; PRA, panel reactive antibodies (current = PRA at time of transplantation, peak = historically highest measured PRA); SD, standard deviation.

**Supplementary Table S3:** Incidence of rejection according to the treatment group\*

|                   | <b>Belatacept group<br/>(n = 20)</b> | <b>Tacrolimus group<br/>(n = 20)</b> | <b>p</b>     |
|-------------------|--------------------------------------|--------------------------------------|--------------|
| Borderline        | 0 (0%)                               | 0 (0%)                               | -            |
| Type 1            |                                      |                                      | 1.00         |
| • 1A              | 0 (0%)                               | 0 (0%)                               |              |
| • 1B              | 1 (5%)                               | 1 (5%)                               |              |
| Type 2            |                                      |                                      | 0.004        |
| • 2A              | 2 (10%)                              | 1 (5%)                               |              |
| • 2B              | 6 (30%)                              | 0 (0%)                               |              |
| Type 3            | 1 (5%)                               | 0 (0%)                               | 1.00         |
| Mixed             | 1 (5%)                               | 0 (0%)                               | 1.00         |
| <b>Total BPAR</b> | <b>11 (55%)</b>                      | <b>2 (10%)</b>                       | <b>0.006</b> |

The incidence of the first rejection episodes is given. The highest Banff score is depicted if sequential biopsies were performed.

BPAR, Biopsy-proven acute rejection

**Supplementary Table S4:** Immunosuppressive drugs dose and pre-dose concentrations

|                | <i>TAC-treated patients</i> |                                     |                         |                                     |                          | <i>BELA-treated patients</i> |                         |                                     |                          |
|----------------|-----------------------------|-------------------------------------|-------------------------|-------------------------------------|--------------------------|------------------------------|-------------------------|-------------------------------------|--------------------------|
|                | <b>TAC dose</b><br>(mg)     | <b>TAC C<sub>0</sub></b><br>(ng/ml) | <b>MMF dose</b><br>(mg) | <b>MPA C<sub>0</sub></b><br>(µg/ml) | <b>PRED dose</b><br>(mg) | <b>BELA dose</b><br>(mg)     | <b>MMF dose</b><br>(mg) | <b>MPA C<sub>0</sub></b><br>(µg/ml) | <b>PRED dose</b><br>(mg) |
| <b>Day 4</b>   | 16.7 (± 2.5)                | 16.8 (± 6.2)                        | 2000 (± 0)              | 3.35 (± 1.59)                       | 20.0 (± 0)               | 792 (± 153)                  | 2000 (± 0)              | 3.85 (± 1.55)                       | 20.0 (± 0)               |
| <b>Day 30</b>  | 8.9 (± 4.6)                 | 9.8 (± 3.3)                         | 1750 (± 546)            | 2.69 (± 1.57)                       | 12.5 (± 3.3)             | 767 (± 106)                  | 1682 (± 603)            | 3.39 (± 1.74)                       | 10.5 (± 2.7)             |
| <b>Day 90</b>  | 4.7 (± 1.4)                 | 6.8 (± 1.7)                         | 1342 (± 473)            | 2.83 (± 1.62)                       | 5.4 (± 1.3)              | 774 (± 130)                  | 1364 (± 393)            | 3.27 (± 1.57)                       | 5.0 (± 0)                |
| <b>Day 180</b> | 4.3 (± 1.1)                 | 6.3 (± 1.5)                         | 1181 (± 499)            | 2.17 (± 0.98)                       | 4.7 (± 1.2)              | 383 (± 63)                   | 1222 (± 441)            | 2.15 (± 1.34)                       | 5.0 (± 0)                |
| <b>Day 360</b> | 4.2 (± 1.3)                 | 7.0 (± 2.3)                         | 1103 (± 493)            | 2.02 (± 0.92)                       | 4.3 (± 1.5)              | 382 (± 58)                   | 1139 (± 377)            | 1.99 (± 0.63)                       | 5.0 (± 0)                |

mean (±SD)

# Supplementary Figure S5

p38MAPK in CD4+CD28+ cells

ERK in CD4+CD28+ cells

Akt in CD4+CD28+ cells

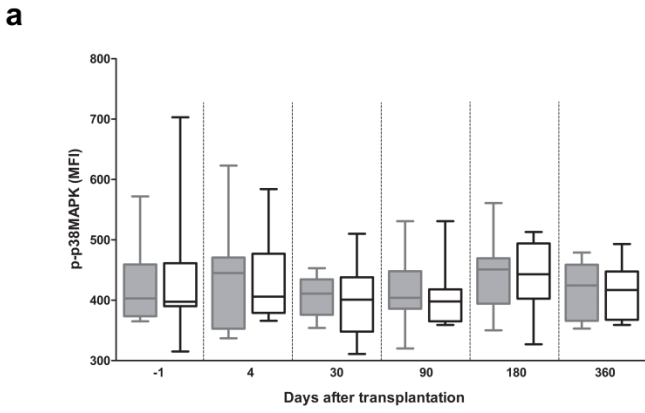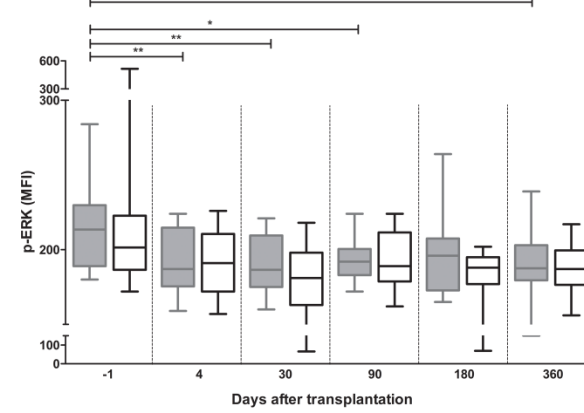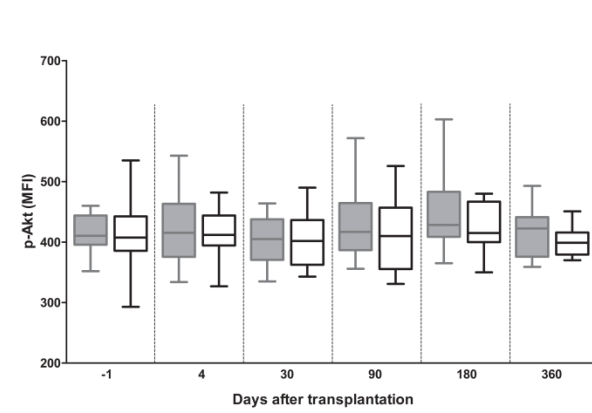

p38MAPK in CD8+CD28+ cells

ERK in CD8+CD28+ cells

Akt in CD8+CD28+ cells

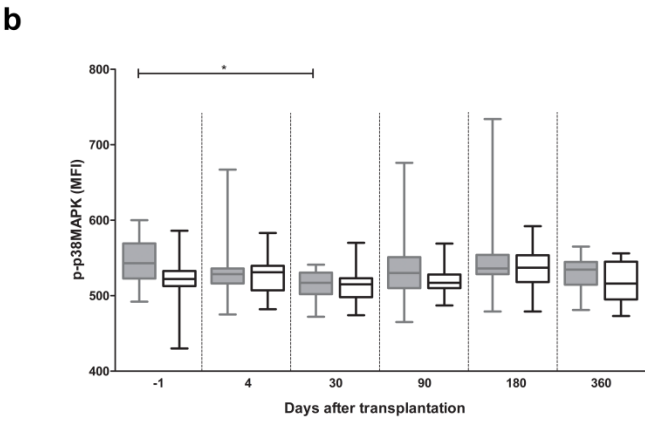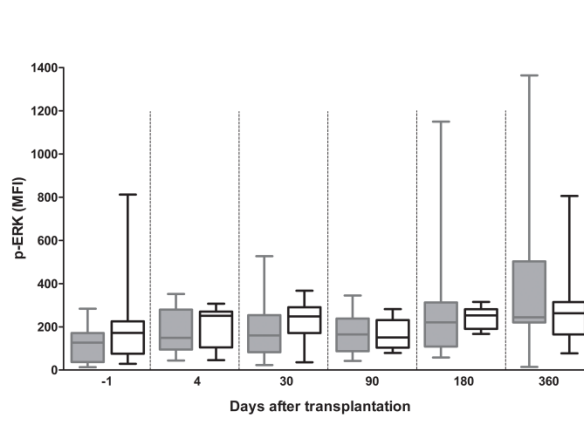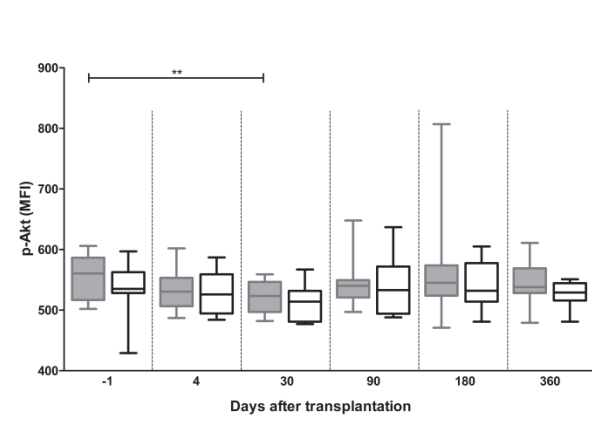

p38MAPK in CD8+CD28- cells

ERK in CD8+CD28- cells

Akt in CD8+CD28- cells

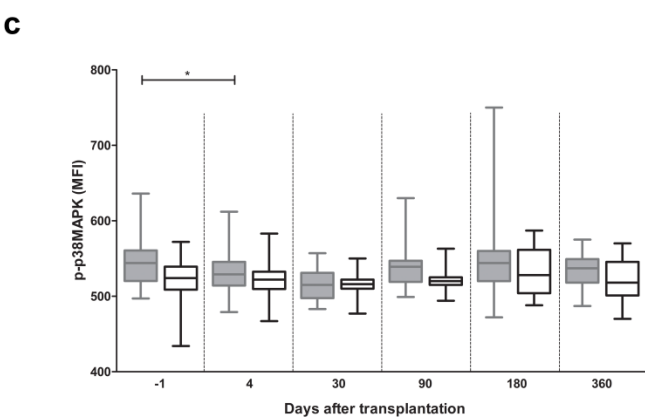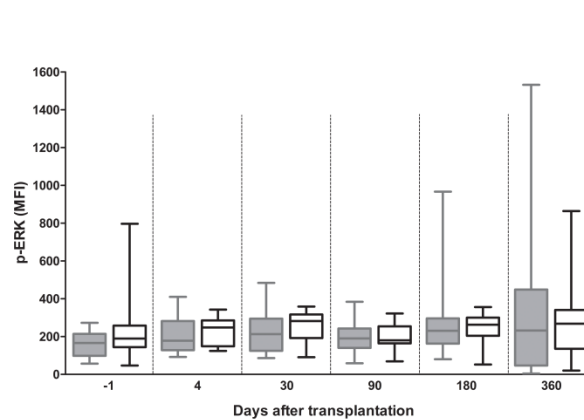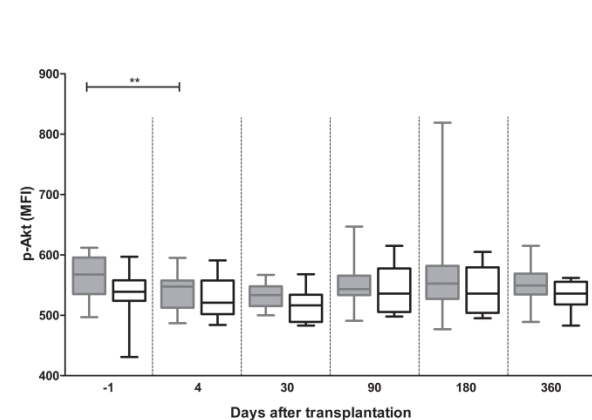

**Supplementary Figure S5.** P-p38MAPK, p-ERK and p-Akt in unstimulated T cell subsets of TAC (*grey*)- and BELA (*white*)-treated patients before and after transplantation. **a)** p-p38MAPK (left), p-ERK (middle) and p-Akt (right) within CD4<sup>+</sup>CD28<sup>+</sup> T cells. P-ERK was significantly decreased in TAC-treated patients, but not in BELA-treated patients. **b)** p-p38MAPK (left), p-ERK (middle) and p-Akt (right) within CD8<sup>+</sup>CD28<sup>+</sup> T cells. P-p38MAPK and p-AKT were only inhibited at day 30 after transplantation when TAC was given. **c)** p-p38MAPK (left), p-ERK (middle) and p-Akt (right) within CD8<sup>+</sup>CD28<sup>-</sup> T cells. Phosphorylation inhibition is comparable with CD8<sup>+</sup>CD28<sup>+</sup> T cells. (Data are plotted as box and whiskers indicating total range; n=20 TAC-treated patients and n=20 BELA-treated patients) \*) p < 0.05, \*\*) p < 0.01, \*\*\*) p < 0.001



**Supplementary Table S6.** Univariate regression analysis between patient demographic characteristics and signaling protein phosphorylation

|                               | Predictor                                     | p-p38MAPK |                | p-ERK   |                | p-Akt   |                |
|-------------------------------|-----------------------------------------------|-----------|----------------|---------|----------------|---------|----------------|
|                               |                                               | $\beta$   | <i>p value</i> | $\beta$ | <i>p value</i> | $\beta$ | <i>p value</i> |
| <b>Before transplantation</b> | Age (years)                                   | 0.381     | 0.045          | -0.175  | 0.374          | 0.126   | 0.523          |
|                               | Gender (male vs female)                       | -0.267    | 0.169          | 0.267   | 0.169          | -0.273  | 0.160          |
|                               | Ethnicity (non caucasian vs caucasian)        | -0.370    | 0.053          | -0.016  | 0.934          | -0.324  | 0.092          |
|                               | Bodyweight before transplantation (kg)        | 0.222     | 0.257          | 0.321   | 0.096          | 0.210   | 0.284          |
|                               | Highest PRA (%)                               | 0.068     | 0.730          | 0.049   | 0.805          | 0.069   | 0.727          |
|                               | HLA total mismatches (4 or more vs 3 or less) | -0.046    | 0.815          | 0.102   | 0.607          | -0.075  | 0.704          |
|                               | HLA DR mismatches (2 vs 1)                    | -0.228    | 0.243          | 0.197   | 0.315          | 0.147   | 0.457          |
|                               | CMV (negative vs positive)                    | 0.234     | 0.230          | -0.363  | 0.058          | 0.142   | 0.470          |
|                               | Renal replacement therapy (no vs yes)         | -0.067    | 0.735          | -0.023  | 0.906          | -0.099  | 0.616          |
|                               | CD86 molecules/monocyte pre-transplantation   | -0.065    | 0.741          | -0.038  | 0.847          | -0.101  | 0.607          |
|                               | Donor age (years)                             | 0.217     | 0.267          | -0.100  | 0.613          | 0.044   | 0.823          |
|                               | Donor gender (male vs female)                 | -0.032    | 0.873          | -0.072  | 0.715          | -0.029  | 0.884          |
| <b>Day 4</b>                  | Age (years)                                   | 0.423     | 0.031          | 0.049   | 0.806          | -0.252  | 0.205          |
|                               | Gender (m vs f)                               | -0.346    | 0.084          | 0.021   | 0.915          | -0.033  | 0.872          |
|                               | Ethnicity (non caucasian vs caucasian)        | -0.285    | 0.159          | -0.006  | 0.975          | -0.152  | 0.448          |
|                               | treatment group (tacrolimus vs belatacept)    | 0.118     | 0.566          | -0.134  | 0.505          | 0.242   | 0.225          |
|                               | Bodyweight before transplantation (kg)        | -0.026    | 0.900          | 0.253   | 0.203          | 0.087   | 0.667          |
|                               | Highest PRA (%)                               | 0.029     | 0.890          | -0.203  | 0.310          | 0.231   | 0.246          |
|                               | HLA total mismatches (4 or more vs 3 or less) | -0.084    | 0.689          | -0.261  | 0.188          | -0.247  | 0.214          |
|                               | HLA DR mismatches (2 vs 1)                    | -0.349    | 0.087          | -0.054  | 0.789          | -0.430  | 0.025          |
|                               | CMV (negative vs positive)                    | 0.270     | 0.191          | 0.112   | 0.577          | 0.054   | 0.788          |
|                               | Renal replacement therapy (no vs yes)         | 0.087     | 0.681          | -0.081  | 0.686          | 0.057   | 0.779          |
|                               | CD86 molecules/monocyte pre-transplantation   | -0.061    | 0.771          | -0.027  | 0.895          | -0.144  | 0.473          |
|                               | Donor age (years)                             | 0.442     | 0.027          | -0.239  | 0.230          | 0.133   | 0.510          |
| Donor gender (male vs female) | -0.047                                        | 0.823     | -0.092         | 0.649   | 0.112          | 0.577   |                |
| <b>Day 360</b>                | Age (years)                                   | 0.388     | 0.055          | 0.213   | 0.307          | 0.049   | 0.816          |
|                               | Gender (m vs f)                               | -0.213    | 0.307          | -0.090  | 0.669          | -0.115  | 0.586          |
|                               | Ethnicity (non caucasian vs caucasian)        | -0.007    | 0.974          | -0.211  | 0.312          | -0.054  | 0.797          |
|                               | treatment group (tacrolimus vs belatacept)    | 0.180     | 0.389          | -0.099  | 0.639          | -0.092  | 0.662          |
|                               | Bodyweight before transplantation (kg)        | -0.162    | 0.438          | 0.161   | 0.442          | -0.045  | 0.829          |
|                               | Highest PRA (%)                               | -0.131    | 0.533          | -0.157  | 0.453          | -0.148  | 0.481          |
|                               | HLA total mismatches (4 or more vs 3 or less) | -0.148    | 0.481          | -0.136  | 0.518          | -0.281  | 0.173          |
|                               | HLA DR mismatches (2 vs 1)                    | 0.020     | 0.923          | -0.106  | 0.613          | 0.154   | 0.462          |
|                               | CMV (negative vs positive)                    | 0.285     | 0.167          | 0.316   | 0.124          | 0.346   | 0.090          |
|                               | Renal replacement therapy (no vs yes)         | 0.080     | 0.705          | 0.198   | 0.344          | -0.046  | 0.828          |
|                               | CD86 molecules/monocyte pre-transplantation   | 0.279     | 0.176          | 0.171   | 0.414          | 0.303   | 0.141          |
|                               | Donor age (years)                             | 0.424     | 0.035          | 0.369   | 0.070          | 0.155   | 0.458          |
| Donor gender (male vs female) | -0.330                                        | 0.107     | 0.060          | 0.774   | -0.275         | 0.184   |                |
